# Supplementary figures and images for: Development and validation of a radiomics deep learning signature from MRI-guided transrectal ultrasound combined with ultrasound imaging parameters for prostate cancer prediction
Source: Research Square preprint supplement (doi:10.21203/rs.3.rs-7653994/v1), 2025-12-08

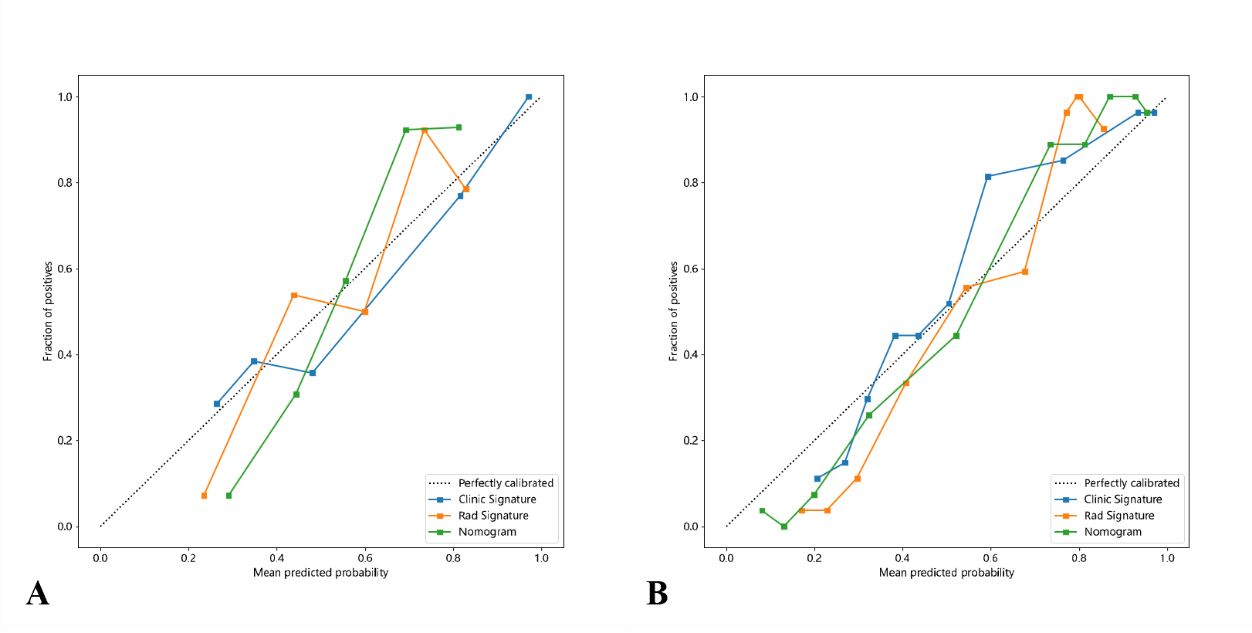


**S1 Fig.** The figure above shows calibration curves for the training cohort（A）and testing cohort（B）.

Supplement: Supplementary file 1 [file 68623afb742fe777ad5cc7d0.docx]
